# Supplementary material
Source: publisher figshare collection journal article supplement (https://karger.figshare.com/ndownloader/files/28660260)
Supplement: Supplementary file 1 [file 28660260]

**Supplementary Table 3. The relation between incidence of p53-RS and smoker status in HCC group**

|  | p53-RS (n=102) | non-p53-RS (n=78) | *2* | *p* |
| --- | --- | --- | --- | --- |
| Smoker status (%) |  | | | |
| Current smoker | 70 (68.63) | 44 (56.41) | 2.339 | 0.126 |
| Former smoker | 32 (31.37) | 34 (43.59) |
